# Supplementary material for: Representation of atmosphere induced heterogeneity in land – atmosphere interactions in E3SM-MMFv2
Source: Copernicus journal article supplement (doi:10.5194/gmd-2023-55), 2023-04-25

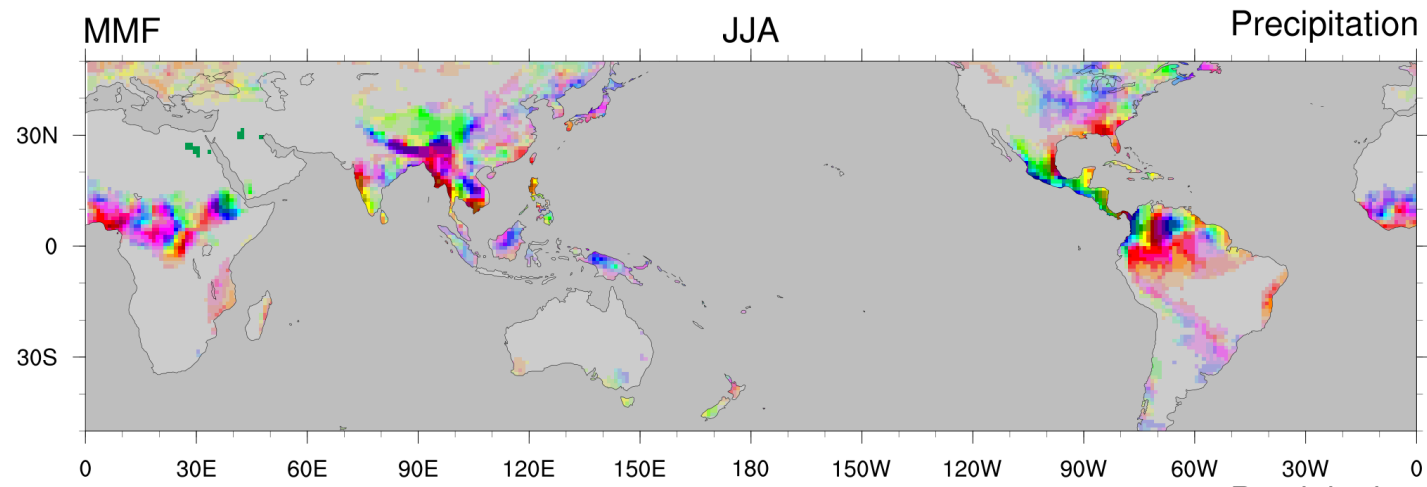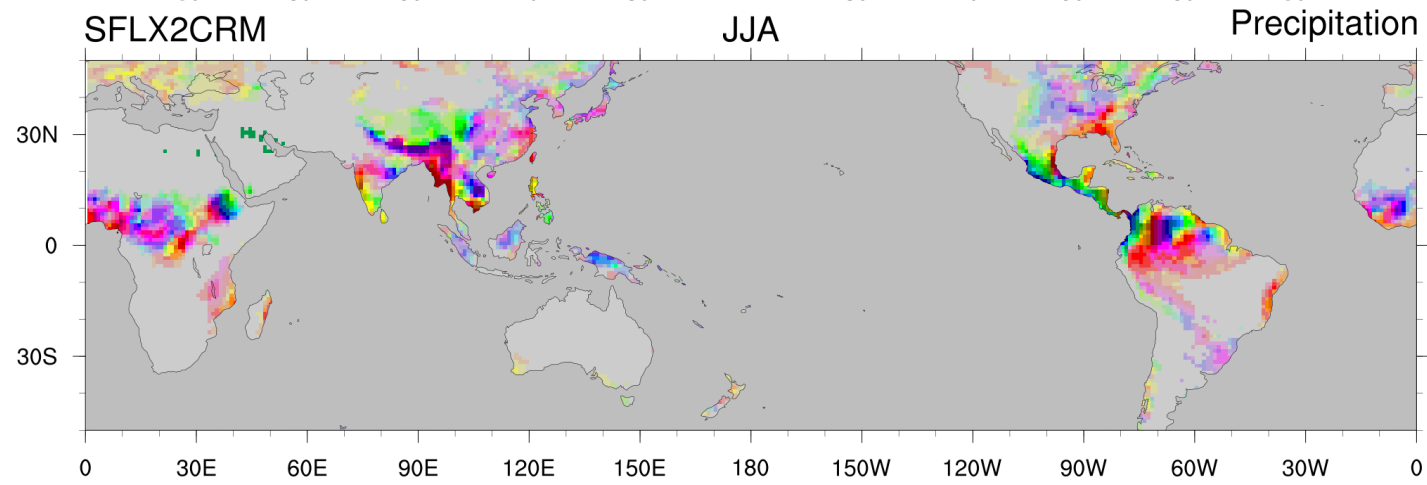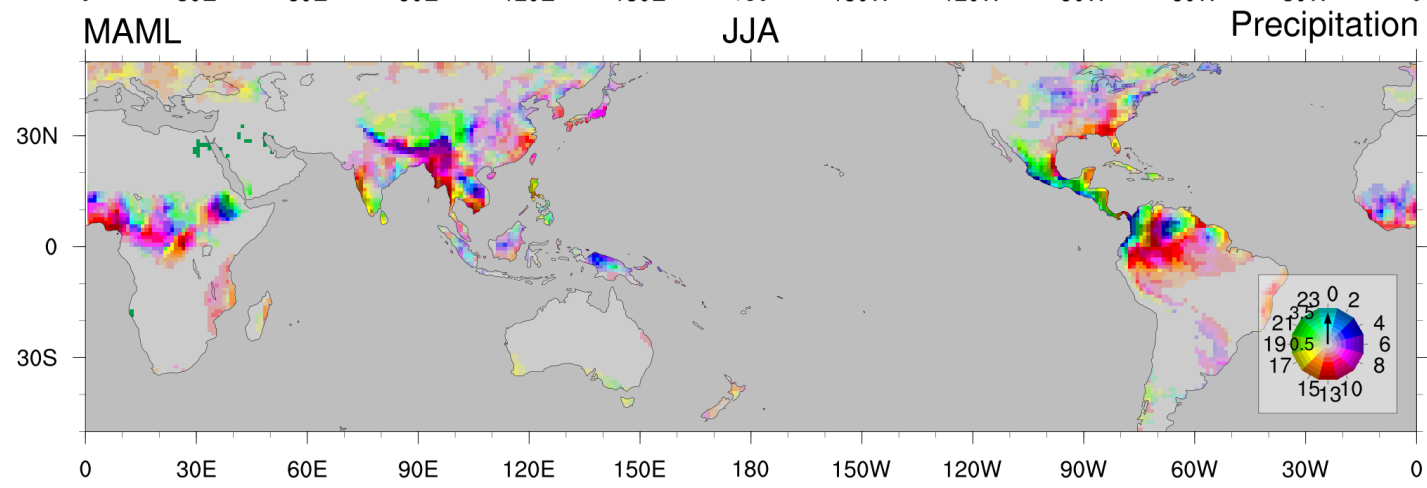

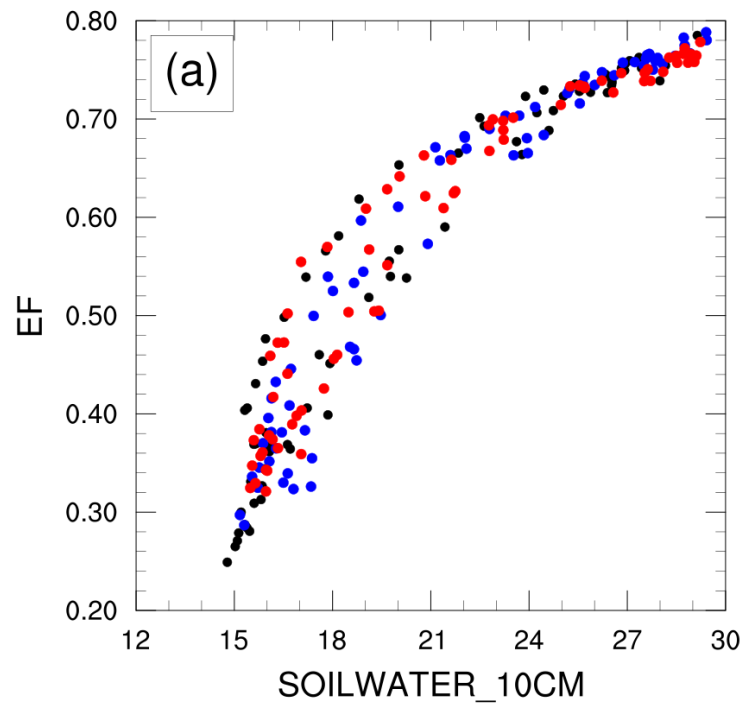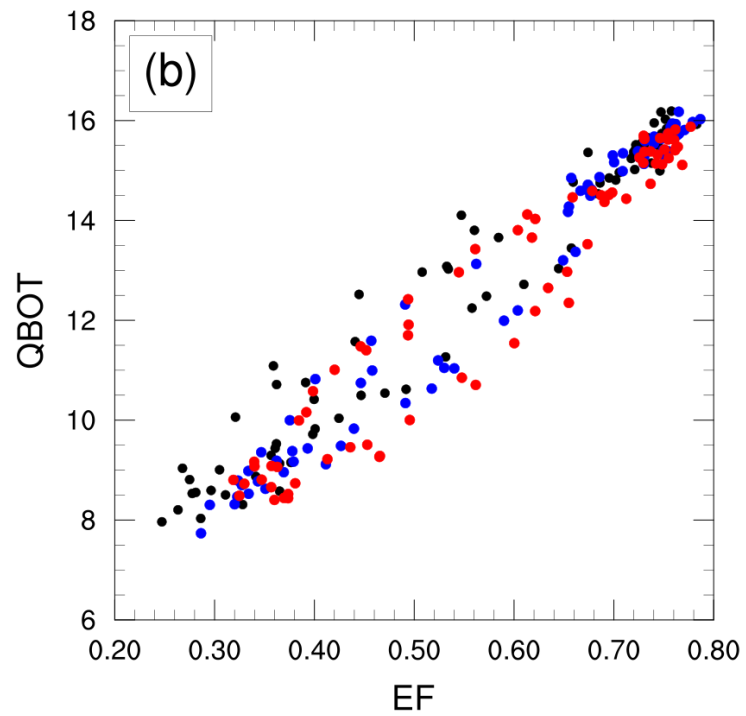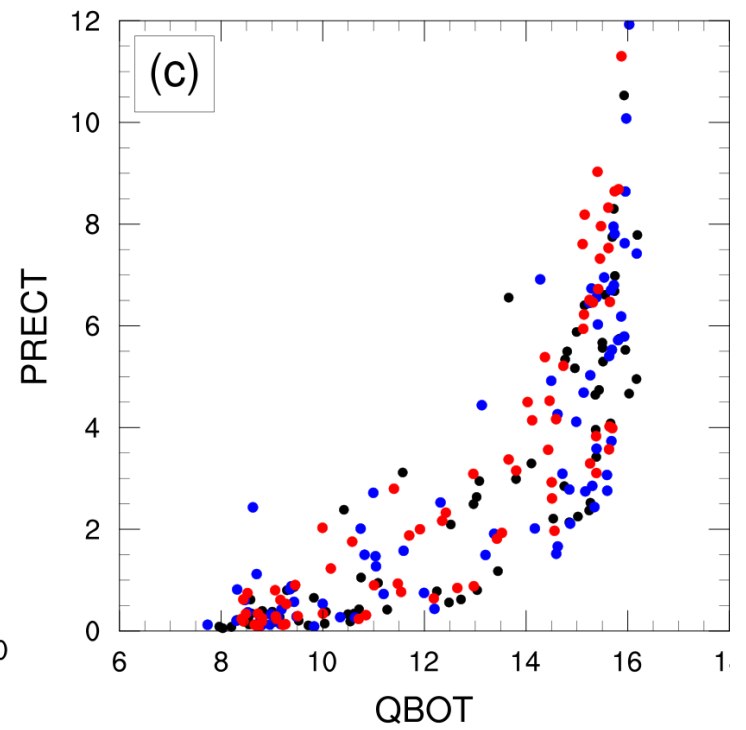

Supplement: Supplementary file [file gmd-2023-55-AC1-supplement.pdf]
