# Supplementary material for: Representation of atmosphere induced heterogeneity in land – atmosphere interactions in E3SM-MMFv2
Source: Copernicus journal article supplement (doi:10.5194/gmd-2023-55), 2023-04-25
Supplement: Supplementary file [file gmd-2023-55-AC2-supplement.pdf]

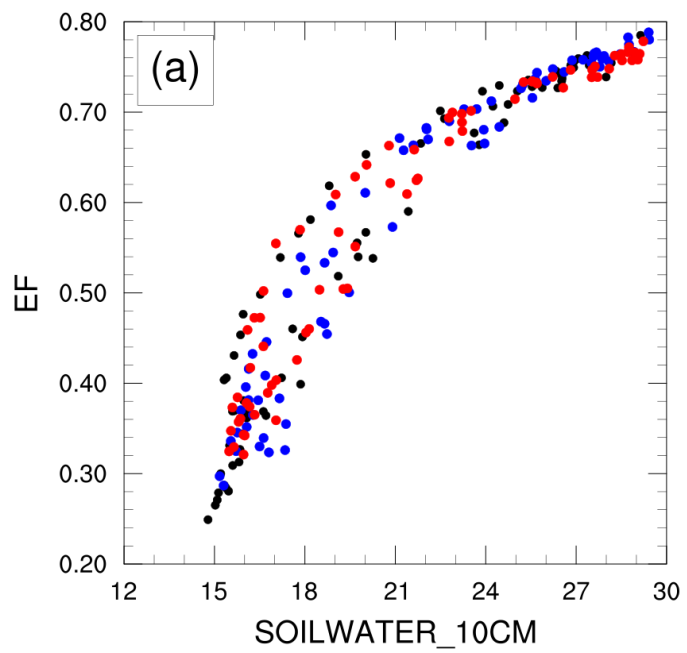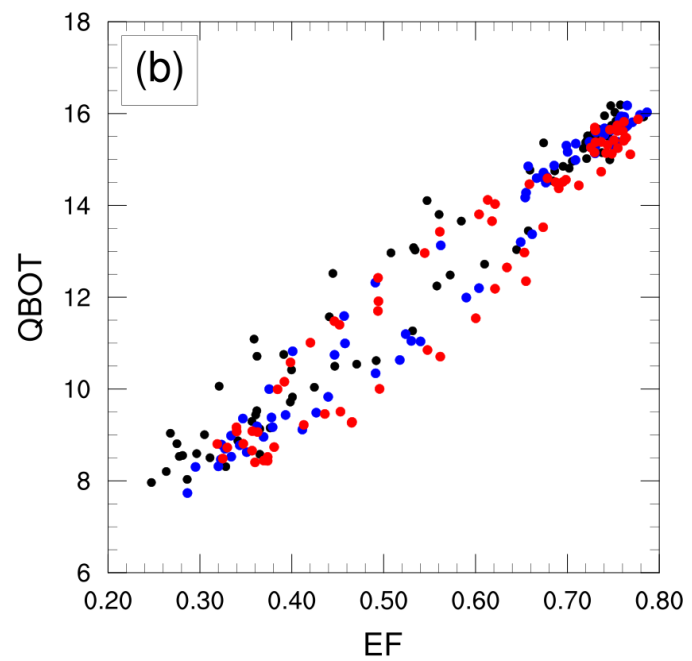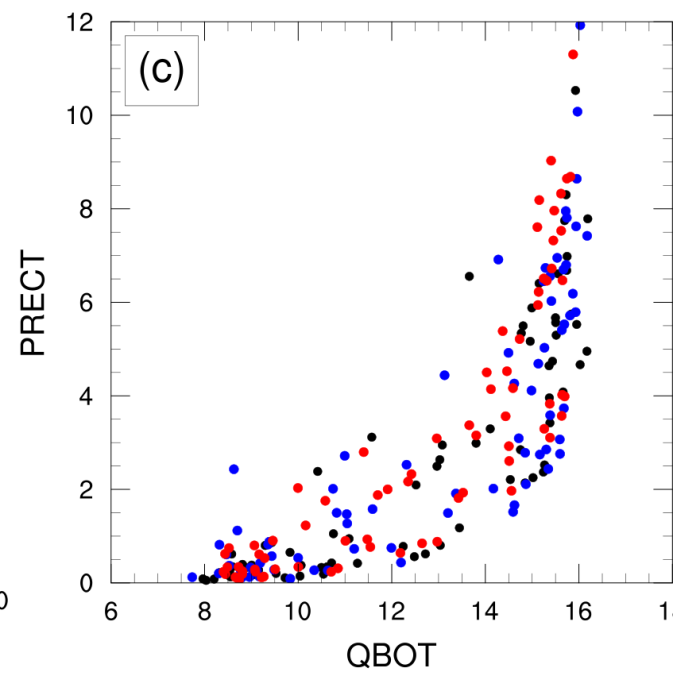

$$BFLX = \frac{SHF}{c_p} + 0.61T_s \frac{LHF}{L_v}$$
